# Supplementary figures and images for: Trends in the electronic and geometric structures of doped two-dimensional quasi-hexagonal C60
Source: Royal Society of Chemistry journal article supplement (doi:10.1039/d5cp00401b), 2025-01-01

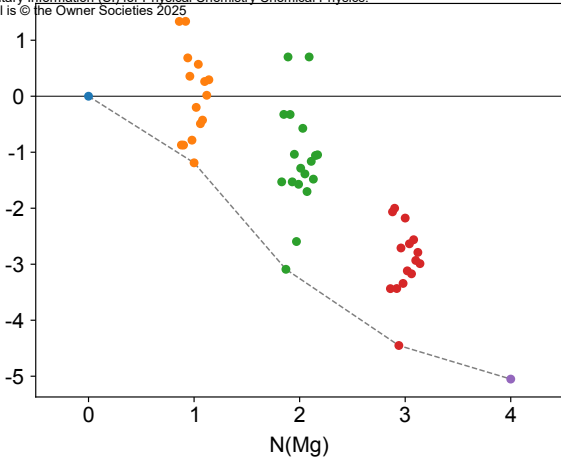

Supplement: d5cp00401b4.pdf [file d5cp00401b4.pdf]

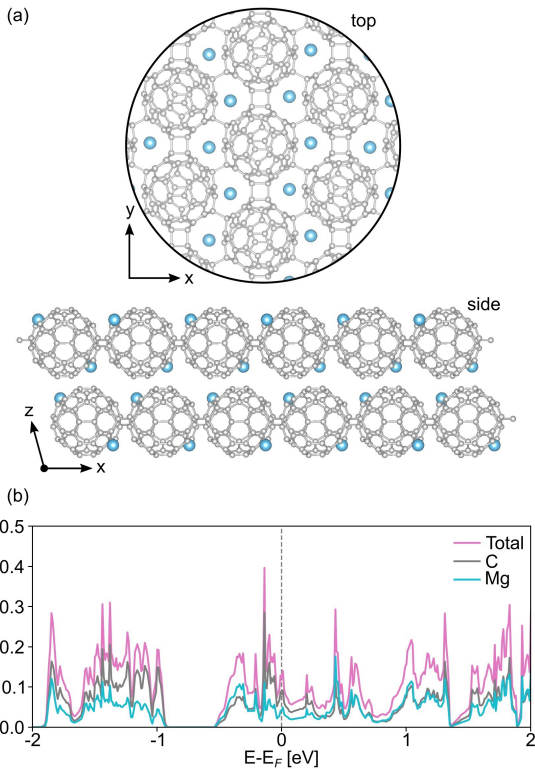

Supplement: d5cp00401b7.pdf [file d5cp00401b7.pdf]

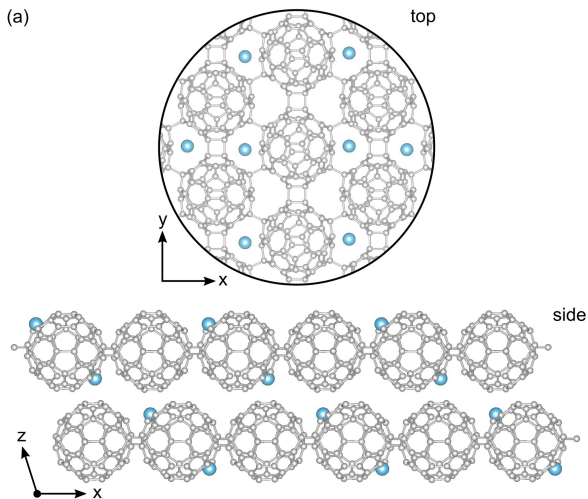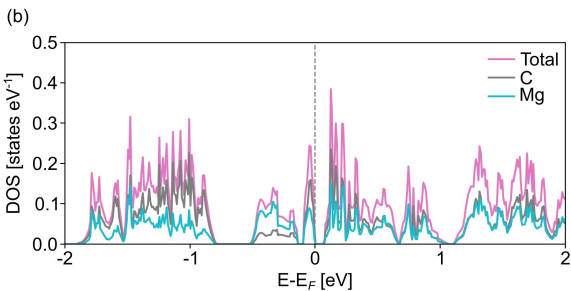

Supplement: d5cp00401b9.pdf [file d5cp00401b9.pdf]
